# Supplementary material
Source: PubMed Central journal article supplement (PMC5803557)

## Supplemental Material

### Title

Changes in the Expression of N- and O-Glycopeptides in Patients with Colorectal Cancer and Hepatocellular Carcinoma Quantified by Full-MS Scan FT-ICR and Multiple Reaction Monitoring.

### Authors

Petra Darebna<sup>2</sup>, Petr Novak<sup>1,2</sup>, Radek Kucera<sup>4</sup>, Ondrej Topolcan<sup>4</sup>, Miloslav Sanda<sup>3</sup>, Radoslav Goldman<sup>3</sup> and Petr Pompach<sup>\*1,2</sup>

- 1) Institute of Microbiology v.v.i., Czech Academy of Sciences, Prague, Czech Republic
- 2) Department of Biochemistry, Faculty of Sciences, Charles University, Prague, Czech Republic
- 3) Department of Oncology, Lombardi Comprehensive Cancer Center, Georgetown University, Washington, DC, USA
- 4) Laboratory of Immunoanalysis, Faculty Hospital in Pilsen, Pilsen, Czech Republic

\*Corresponding author footnote: Petr Pompach, Institute of Microbiology v.v.i., Czech Academy of Sciences, Videnska 1083, Prague 142 20, Czech Republic, email: [pompach@biomed.cas.cz](mailto:pompach@biomed.cas.cz), phone: +420241062348

Supplemental Table 1: Clinical characteristics of the study population. Each group includes 10 participants. CTRL, control; HCC, hepatocellular carcinoma; HCV, hepatitis C virus; HBV, hepatitis B virus. TNM (tumor-node-metastasis), MELD (Model for End-Stage Liver Disease).

|                    | CTRL | Colorectal | Colorectal<br>+ Liver metastases | HCC     | HCC/HCV |
|--------------------|------|------------|----------------------------------|---------|---------|
| <b>Male gender</b> | 7    | 6          | 6                                | 10      | 8       |
| <b>Age (mean)</b>  | 57   | 69         | 63                               | 68      | 56      |
| <b>Race</b>        |      |            |                                  |         |         |
| Caucasian          | 6    | 10         | 10                               | 9       | 6       |
| African-American   | 4    |            |                                  |         | 4       |
| Asian              |      |            |                                  | 1       |         |
| <b>Etiology</b>    |      |            |                                  |         |         |
| HBV                |      |            |                                  | 1       |         |
| HCV                |      |            |                                  |         | 10      |
| <b>Cirrhosis</b>   |      |            |                                  |         |         |
|                    |      |            |                                  | 4       | 10      |
| <b>TNM</b>         |      |            |                                  |         |         |
| T1N0M0             |      |            |                                  |         | 5       |
| T2N0M0             |      |            |                                  |         | 3       |
| <b>MELD</b>        |      |            |                                  |         |         |
|                    |      |            | 10.8±1.4                         | 8.8±2.4 | 11.2±3  |

Supplemental Table 2: List of proteins identified in albumin-depleted human serum by data dependent analysis performed by FT-ICR. Glycopeptides of the highlighted proteins were further quantified by MRM and full-MS scan FT-ICR analysis.

| Row | Accession         | Protein                                      | MW [kDa]     | #Peptides | SC [%]      | RMS90 [ppm] |
|-----|-------------------|----------------------------------------------|--------------|-----------|-------------|-------------|
| 1   | IGKC_HUMAN        | Ig kappa chain C region                      | 11.6         | 9         | 85.8        | 0.77        |
| 2   | LAC2_HUMAN        | Ig lambda-2 chain C regions                  | 11.3         | 4         | 74.5        | 0.44        |
| 3   | ALBU_HUMAN        | Serum albumin                                | 69.3         | 51        | 73.7        | 0.74        |
| 4   | FIBB_HUMAN        | Fibrinogen beta chain                        | 55.9         | 20        | 62.5        | 0.62        |
| 5   | <b>TRFE_HUMAN</b> | <b>Serotransferrin</b>                       | <b>77.0</b>  | <b>34</b> | <b>59.6</b> | <b>0.63</b> |
| 6   | LAC1_HUMAN        | Ig lambda-1 chain C regions                  | 11.3         | 4         | 58.5        | 0.24        |
| 7   | IGHG1_HUMAN       | Ig gamma-1 chain C region                    | 36.1         | 12        | 53.6        | 0.59        |
| 8   | TTHY_HUMAN        | Transthyretin                                | 15.9         | 5         | 53.1        | 1.49        |
| 9   | <b>HPT_HUMAN</b>  | <b>Haptoglobin</b>                           | <b>45.2</b>  | <b>14</b> | <b>51.0</b> | <b>0.56</b> |
| 10  | IGHA1_HUMAN       | Ig alpha-1 chain C region                    | 37.6         | 12        | 47.3        | 0.49        |
| 11  | IGHG2_HUMAN       | Ig gamma-2 chain C region                    | 35.9         | 10        | 38.0        | 0.56        |
| 12  | IGHG3_HUMAN       | Ig gamma-3 chain C region                    | 41.3         | 10        | 37.1        | 0.52        |
| 13  | IGHG4_HUMAN       | Ig gamma-4 chain C region                    | 35.9         | 7         | 35.8        | 0.79        |
| 14  | <b>FIBA_HUMAN</b> | <b>Fibrinogen alpha chain</b>                | <b>94.9</b>  | <b>20</b> | <b>33.8</b> | <b>0.74</b> |
| 15  | IGHA2_HUMAN       | Ig alpha-2 chain C region                    | 36.5         | 8         | 33.5        | 0.39        |
| 16  | A1AT_HUMAN        | Alpha-1-antitrypsin                          | 46.7         | 11        | 32.8        | 0.57        |
| 17  | FIBG_HUMAN        | Fibrinogen gamma chain                       | 51.5         | 9         | 32.5        | 0.88        |
| 18  | APOA1_HUMAN       | Apolipoprotein A-I                           | 30.8         | 7         | 27.3        | 0.34        |
| 19  | <b>CO3_HUMAN</b>  | <b>Complement C3</b>                         | <b>187.0</b> | <b>29</b> | <b>27.1</b> | <b>0.55</b> |
| 20  | IGHM_HUMAN        | Ig mu chain C region                         | 49.3         | 9         | 26.1        | 0.33        |
| 21  | IGJ_HUMAN         | Immunoglobulin J chain                       | 18.1         | 3         | 23.3        | 0.50        |
| 22  | KV204_HUMAN       | Ig kappa chain V-II region TEW               | 12.3         | 1         | 21.2        | 0.56        |
| 23  | ANT3_HUMAN        | Antithrombin-III                             | 52.6         | 5         | 21.1        | 0.56        |
| 24  | <b>A2MG_HUMAN</b> | <b>Alpha-2-macroglobulin</b>                 | <b>163.2</b> | <b>17</b> | <b>21.0</b> | <b>0.53</b> |
| 25  | CLUS_HUMAN        | Clusterin                                    | 52.5         | 5         | 20.3        | 0.47        |
| 26  | AMBP_HUMAN        | Protein AMBP                                 | 39.0         | 3         | 18.8        | 0.69        |
| 27  | CFAH_HUMAN        | Complement factor H                          | 139.0        | 13        | 18.7        | 0.64        |
| 28  | LV403_HUMAN       | Ig lambda chain V-IV region Hil              | 11.5         | 1         | 17.8        | 0.20        |
| 29  | APOH_HUMAN        | Beta-2-glycoprotein 1                        | 38.3         | 3         | 17.4        | 0.76        |
| 30  | VTNC_HUMAN        | Vitronectin                                  | 54.3         | 5         | 16.9        | 0.82        |
| 31  | KV104_HUMAN       | Ig kappa chain V-I region CAR                | 11.7         | 1         | 16.8        | 0.15        |
| 32  | KV101_HUMAN       | Ig kappa chain V-I region AG                 | 12.0         | 1         | 16.7        | 0.58        |
| 33  | KV302_HUMAN       | Ig kappa chain V-III region SIE              | 11.8         | 1         | 16.5        | 0.46        |
| 34  | HV305_HUMAN       | Ig heavy chain V-III region BRO              | 13.2         | 1         | 15.8        | 0.05        |
| 35  | VTDB_HUMAN        | Vitamin D-binding protein                    | 52.9         | 4         | 15.8        | 0.65        |
| 36  | KV402_HUMAN       | Ig kappa chain V-IV region Len               | 12.6         | 1         | 15.8        | 0.11        |
| 37  | <b>HEMO_HUMAN</b> | <b>Hemopexin</b>                             | <b>51.6</b>  | <b>6</b>  | <b>15.4</b> | <b>0.65</b> |
| 38  | CO4A_HUMAN        | Complement C4-A                              | 192.7        | 12        | 14.5        | 0.97        |
| 39  | LV302_HUMAN       | Ig lambda chain V-III region LOI             | 11.9         | 1         | 14.4        | 0.05        |
| 40  | PLMN_HUMAN        | Plasminogen                                  | 90.5         | 7         | 13.5        | 0.32        |
| 41  | HBB_HUMAN         | Hemoglobin subunit beta                      | 16.0         | 1         | 12.9        | 2.20        |
| 42  | A1BG_HUMAN        | Alpha-1B-glycoprotein                        | 54.2         | 3         | 11.7        | 0.23        |
| 43  | ITIH2_HUMAN       | Inter-alpha-trypsin inhibitor heavy chain H2 | 106.4        | 4         | 9.6         | 1.19        |

|    |             |                                 |      |   |     |      |
|----|-------------|---------------------------------|------|---|-----|------|
| 44 | HV306_HUMAN | Ig heavy chain V-III region BUT | 12.4 | 1 | 9.6 | 0.58 |
| 45 | KNG1_HUMAN  | Kininogen-1                     | 71.9 | 5 | 9.5 | 0.31 |

Supplemental Table 3: List of glycopeptides selected for quantification by MRM. Com. – Complement C3, Fib. – Fibronectin, Hpt. – Haptoglobin, Hpx. – Hemopexin, Mac. – Alpha-2-macroglobulin, Ser. – Serotransferin. Q1 – precursor ion, Q3 – transition.

| Protein/sequence/glycopeptide | Q1 (m/z) | Q3 (m/z) | Protein/sequence/glycopeptide | Q1 (m/z) | Q3 (m/z) |
|-------------------------------|----------|----------|-------------------------------|----------|----------|
| Com.1601-1624-A2G2.204        | 1116.8   | 204      | Hpx.181-193-A2G2.204          | 1009.8   | 204      |
| Com.1601-1624-A2G2.366        | 1116.8   | 366.1    | Hpx.181-193-A2G2.366          | 1009.8   | 366.1    |
| Com.1601-1624-A2G2.pepHexNAc  | 1116.8   | 1015.5   | Hpx.181-193-A2G2.pepHexNAc    | 1009.8   | 804.4    |
| Com.74-94-A2G2.204            | 970.2    | 204      | Hpx.181-193-A2G2F1.204        | 1058.4   | 204      |
| Com.74-94-A2G2.366            | 970.2    | 366.1    | Hpx.181-193-A2G2F1.366        | 1058.4   | 366.1    |
| Com.74-94-A2G2.pepHexNAc      | 970.2    | 1229.6   | Hpx.181-193-A2G2F1.pepHexNAc  | 1058.4   | 804.4    |
| Com.74-94-A2G2F1.204          | 1006.7   | 204      | Hpx.181-193-A3G3.204          | 848.9    | 204      |
| Com.74-94-A2G2F1.366          | 1006.7   | 366.1    | Hpx.181-193-A3G3.366          | 848.9    | 366.1    |
| Com.74-94-A2G2F1.pepHexNAc    | 1006.7   | 1229.6   | Hpx.181-193-A3G3.pepHexNAc    | 848.9    | 804.4    |
| Com.74-94-A2G3.204            | 1061.5   | 204      | Hpx.181-193-A3G3F1.204        | 885.4    | 204      |
| Com.74-94-A2G3.366            | 1061.5   | 366.1    | Hpx.181-193-A3G3F1.366        | 885.4    | 366.1    |
| Com.74-94-A2G3.pepHexNAc      | 1061.5   | 1229.6   | Hpx.181-193-A3G3F1.512        | 885.4    | 512.1    |
| Com.74-94-A2G3F1.204          | 1098     | 204      | Hpx.181-193-A3G3F1.pepHexNAc  | 885.4    | 804.4    |
| Com.74-94-A2G3F1.366          | 1098     | 366.1    | Hpx.181-193-A3G3F2.204        | 921.9    | 204      |
| Com.74-94-A2G3F1.pepHexNAc    | 1098     | 1229.6   | Hpx.181-193-A3G3F2.366        | 921.9    | 366.1    |
|                               |          |          | Hpx.181-193-A3G3F2.512        | 921.9    | 512.1    |
| Fib.377-395-A2G2.204          | 879.6    | 204      | Hpx.181-193-A3G3F2.pepHexNAc  | 921.9    | 804.4    |
| Fib.377-395-A2G2.366          | 879.6    | 366.1    | Hpx.447-462-A2G2.204          | 1120.2   | 204      |
| Fib.377-395-A2G2.pepHexNAc    | 879.6    | 1048.5   | Hpx.447-462-A2G2.366          | 1120.2   | 366.1    |
| Fib.377-395-A2G2F1.204        | 916.1    | 204      | Hpx.447-462-A2G2.pepHexNAc    | 1120.2   | 970      |
| Fib.377-395-A2G2F1.366        | 916.1    | 366.1    | Hpx.447-462-A2G2F1.204        | 876.9    | 204      |
| Fib.377-395-A2G2F1.pepHexNAc  | 916.1    | 1048.5   | Hpx.447-462-A2G2F1.366        | 876.9    | 366.1    |
| Fib.377-395-A3G3.204          | 970.9    | 204      | Hpx.447-462-A2G2F1.pepHexNAc  | 876.9    | 970      |
| Fib.377-395-A3G3.366          | 970.9    | 366.1    | Hpx.447-462-A3G3.204          | 931.7    | 204      |
| Fib.377-395-A3G3.pepHexNAc    | 970.9    | 1048.5   | Hpx.447-462-A3G3.366          | 931.7    | 366.1    |
| Fib.377-395-A3G3F1.204        | 1007.4   | 204      | Hpx.447-462-A3G3.pepHexNAc    | 931.7    | 970      |
| Fib.377-395-A3G3F1.366        | 1007.4   | 366.1    | Hpx.447-462-A3G3F1.204        | 968.2    | 204      |
| Fib.377-395-A3G3F1.pepHexNAc  | 1007.4   | 1048.5   | Hpx.447-462-A3G3F1.366        | 968.2    | 366.1    |
| Fib.427-436-A2G2.204          | 716.3    | 204      | Hpx.447-462-A3G3F1.512        | 968.2    | 512.1    |
| Fib.427-436-A2G2.366          | 716.3    | 366.1    | Hpx.447-462-A3G3F1.pepHexNAc  | 968.2    | 970      |
| Fib.427-436-A2G2.pepHexNAc    | 716.3    | 721.8    | Hpx.447-462-A3G3F2.204        | 1004.7   | 204      |
| Fib.427-436-A2G2F1.204        | 752.8    | 204      | Hpx.447-462-A3G3F2.366        | 1004.7   | 366.1    |
| Fib.427-436-A2G2F1.366        | 752.8    | 366.1    | Hpx.447-462-A3G3F2.512        | 1004.7   | 512.1    |
| Fib.427-436-A2G2F1.pepHexNAc  | 752.8    | 721.8    | Hpx.447-462-A3G3F2.pepHexNAc  | 1004.7   | 970      |
| Fib.427-436-A3G3.204          | 807.6    | 204      | Hpx.O-glycans-1N1H1NA.204     | 843.6    | 204      |

|                              |        |        |                                 |        |        |
|------------------------------|--------|--------|---------------------------------|--------|--------|
| Fib.427-436-A3G3.366         | 807.6  | 366.1  | Hpx.O-glycans-1N1H1NA.366       | 843.6  | 366.1  |
| Fib.427-436-A3G3.pepHexNAc   | 807.6  | 721.8  | Hpx.O-glycans-1N1H1NA.pepHexNAc | 843.6  | 973.5  |
| Fib.427-436-A3G3F1.204       | 844.1  | 204    | Hpx.O-glycans-1N1H2NA.204       | 916.4  | 204    |
| Fib.427-436-A3G3F1.366       | 844.1  | 366.1  | Hpx.O-glycans-1N1H2NA.366       | 916.4  | 366.1  |
| Fib.427-436-A3G3F1.pepHexNAc | 844.1  | 721.8  | Hpx.O-glycans-1N1H2NA.pepHexNAc | 916.4  | 973.5  |
| Fib.427-445-A2G2.204         | 960.6  | 204    |                                 |        |        |
| Fib.427-445-A2G2.366         | 960.6  | 366.1  | Mac.1422-1440-A2G2.204          | 947.2  | 204    |
| Fib.427-445-A2G2.pepHexNAc   | 960.6  | 1210.5 | Mac.1422-1440-A2G2.366          | 947.2  | 366.1  |
| Fib.427-445-A2G2F1.204       | 997.2  | 204    | Mac.1422-1440-A2G2.pepHexNAc    | 947.2  | 1183.6 |
| Fib.427-445-A2G2F1.366       | 997.2  | 366.1  | Mac.1422-1440-A2G2F1.204        | 983.7  | 204    |
| Fib.427-445-A2G2F1.pepHexNAc | 997.2  | 1210.5 | Mac.1422-1440-A2G2F1.366        | 983.7  | 366.1  |
| Fib.427-445-A3G3.204         | 1051.9 | 204    | Mac.1422-1440-A2G2F1.pepHexNAc  | 983.7  | 1183.6 |
| Fib.427-445-A3G3.366         | 1051.9 | 366.1  | Mac.1422-1440-A3G3.204          | 1038.5 | 204    |
| Fib.427-445-A3G3.pepHexNAc   | 1051.9 | 1048.5 | Mac.1422-1440-A3G3.366          | 1038.5 | 366.1  |
| Fib.427-445-A3G3F1.204       | 1088.4 | 204    | Mac.1422-1440-A3G3.pepHexNAc    | 1038.5 | 1183.6 |
| Fib.427-445-A3G3F1.366       | 1088.4 | 366.1  | Mac.1422-1440-A3G3F1.204        | 1075   | 204    |
| Fib.427-445-A3G3F1.pepHexNAc | 1088.4 | 1048.5 | Mac.1422-1440-A3G3F1.366        | 1075   | 366.1  |
|                              |        |        | Mac.1422-1440-A3G3F1.512        | 1075   | 512.1  |
| Hpt.197-202-A2G2.204         | 1076.2 | 204    | Mac.1422-1440-A3G3F1.pepHexNAc  | 1075   | 1183.6 |
| Hpt.197-202-A2G2.366         | 1076.2 | 366.1  | Mac.1422-1440-A3G3F2.204        | 1111.5 | 204    |
| Hpt.197-202-A2G2.pepHexNAc   | 1076.2 | 961.5  | Mac.1422-1440-A3G3F2.366        | 1111.5 | 366.1  |
| Hpt.197-202-A2G2F1.204       | 1112.8 | 204    | Mac.1422-1440-A3G3F2.512        | 1111.5 | 512.1  |
| Hpt.197-202-A2G2F1.366       | 1112.8 | 366.1  | Mac.1422-1440-A3G3F2.pepHexNAc  | 1111.5 | 1183.6 |
| Hpt.197-202-A2G2F1.pepHexNAc | 1112.8 | 961.5  | Mac.47-68-A2G2.204              | 1005.7 | 204    |
| Hpt.197-202-A3G3.204         | 1167.5 | 204    | Mac.47-68-A2G2.366              | 1005.7 | 366.1  |
| Hpt.197-202-A3G3.366         | 1167.5 | 366.1  | Mac.47-68-A2G2.pepHexNAc        | 1005.7 | 867.1  |
| Hpt.197-202-A3G3.pepHexNAc   | 1167.5 | 961.5  | Mac.47-68-A2G2F1.204            | 1042.2 | 204    |
| Hpt.197-202-A3G3F1.204       | 1204   | 204    | Mac.47-68-A2G2F1.366            | 1042.2 | 366.1  |
| Hpt.197-202-A3G3F1.366       | 1204   | 366.1  | Mac.47-68-A2G2F1.pepHexNAc      | 1042.2 | 867.1  |
| Hpt.197-202-A3G3F1.512       | 1204   | 512.1  | Mac.47-68-A3G3.204              | 1097   | 204    |
| Hpt.197-202-A3G3F1.pepHexNAc | 1204   | 961.5  | Mac.47-68-A3G3.366              | 1097   | 366.1  |
| Hpt.197-202-A3G3F2.204       | 992.7  | 204    | Mac.47-68-A3G3.pepHexNAc        | 1097   | 867.1  |
| Hpt.197-202-A3G3F2.366       | 992.7  | 366.1  | Mac.47-68-A3G3F1.204            | 1133.5 | 204    |
| Hpt.197-202-A3G3F2.512       | 992.7  | 512.1  | Mac.47-68-A3G3F1.366            | 1133.5 | 366.1  |
| Hpt.197-202-A3G3F2.pepHexNAc | 992.7  | 961.5  | Mac.47-68-A3G3F1.512            | 1133.5 | 512.1  |
| Hpt.197-202-A4G4.204         | 1007.3 | 204    | Mac.47-68-A3G3F1.pepHexNAc      | 1133.5 | 867.1  |
| Hpt.197-202-A4G4.366         | 1007.3 | 366.1  | Mac.47-68-A3G3F2.204            | 1170   | 204    |
| Hpt.197-202-A4G4.pepHexNAc   | 1007.3 | 961.5  | Mac.47-68-A3G3F2.366            | 1170   | 366.1  |
| Hpt.197-202-A4G4F1.204       | 1036.5 | 204    | Mac.47-68-A3G3F2.512            | 1170   | 512.1  |
| Hpt.197-202-A4G4F1.366       | 1036.5 | 366.1  | Mac.47-68-A3G3F2.pepHexNAc      | 1170   | 867.1  |
| Hpt.197-202-A4G4F1.512       | 1036.5 | 512.1  |                                 |        |        |
| Hpt.197-202-A4G4F1.pepHexNAc | 1036.5 | 961.5  | Ser.421-433-A2G2.204            | 775.6  | 204    |
| Hpt.197-202-A4G4F2.204       | 1065.7 | 204    | Ser.421-433-A2G2.366            | 775.6  | 366.1  |

|                              |        |       |                              |        |       |
|------------------------------|--------|-------|------------------------------|--------|-------|
| Hpt.197-202-A4G4F2.366       | 1065.7 | 366.1 | Ser.421-433-A2G2.pepHexNAc   | 775.6  | 840.4 |
| Hpt.197-202-A4G4F2.512       | 1065.7 | 512.1 | Ser.421-433-A2G2F1.204       | 812.1  | 204   |
| Hpt.197-202-A4G4F2.pepHexNAc | 1065.7 | 961.5 | Ser.421-433-A2G2F1.366       | 812.1  | 366.1 |
| Hpt.197-202-A4G4F3.204       | 1094.9 | 204   | Ser.421-433-A2G2F1.pepHexNAc | 812.1  | 840.4 |
| Hpt.197-202-A4G4F3.366       | 1094.9 | 366.1 | Ser.421-433-A3G3.204         | 866.9  | 204   |
| Hpt.197-202-A4G4F3.512       | 1094.9 | 512.1 | Ser.421-433-A3G3.366         | 866.9  | 366.1 |
| Hpt.197-202-A4G4F3.pepHexNAc | 1094.9 | 961.5 | Ser.421-433-A3G3.pepHexNAc   | 866.9  | 840.4 |
| Hpt.236-251-A2G2.204         | 855.2  | 204   | Ser.421-433-A3G3F1.204       | 903.4  | 204   |
| Hpt.236-251-A2G2.366         | 855.2  | 366.1 | Ser.421-433-A3G3F1.366       | 903.4  | 366.1 |
| Hpt.236-251-A2G2.pepHexNAc   | 855.2  | 999.5 | Ser.421-433-A3G3F1.pepHexNAc | 903.4  | 840.4 |
| Hpt.236-251-A2G2F1.204       | 891.7  | 204   | Ser.622-646-A2G2.204         | 1035.2 | 204   |
| Hpt.236-251-A2G2F1.366       | 891.7  | 366.1 | Ser.622-646-A2G2.366         | 1035.2 | 366.1 |
| Hpt.236-251-A2G2F1.pepHexNAc | 891.7  | 999.5 | Ser.622-646-A2G2.pepHexNAc   | 1035.2 | 906.7 |
| Hpt.236-251-A3G3.204         | 946.4  | 204   | Ser.622-646-A2G2F1.204       | 1071.7 | 204   |
| Hpt.236-251-A3G3.366         | 946.4  | 366.1 | Ser.622-646-A2G2F1.366       | 1071.7 | 366.1 |
| Hpt.236-251-A3G3.pepHexNAc   | 946.4  | 999.5 | Ser.622-646-A2G2F1.pepHexNAc | 1071.7 | 906.7 |
| Hpt.236-251-A3G3F1.204       | 983    | 204   | Ser.622-646-A3G3.204         | 1126.5 | 204   |
| Hpt.236-251-A3G3F1.366       | 983    | 366.1 | Ser.622-646-A3G3.366         | 1126.5 | 366.1 |
| Hpt.236-251-A3G3F1.512       | 983    | 512.1 | Ser.622-646-A3G3.pepHexNAc   | 1126.5 | 906.7 |
| Hpt.236-251-A3G3F1.pepHexNAc | 983    | 999.5 | Ser.622-646-A3G3F1.204       | 1163   | 204   |
| Hpt.236-251-A3G3F2.204       | 1019.5 | 204   | Ser.622-646-A3G3F1.366       | 1163   | 366.1 |
| Hpt.236-251-A3G3F2.366       | 1019.5 | 366.1 | Ser.622-646-A3G3F1.pepHexNAc | 1163   | 906.7 |
| Hpt.236-251-A3G3F2.512       | 1019.5 | 512.1 |                              |        |       |
| Hpt.236-251-A3G3F2.pepHexNAc | 1019.5 | 999.5 |                              |        |       |
| Hpt.236-251-A4G4.204         | 1037.7 | 204   |                              |        |       |
| Hpt.236-251-A4G4.366         | 1037.7 | 366.1 |                              |        |       |
| Hpt.236-251-A4G4.pepHexNAc   | 1037.7 | 999.5 |                              |        |       |
| Hpt.236-251-A4G4F1.204       | 1074.2 | 204   |                              |        |       |
| Hpt.236-251-A4G4F1.366       | 1074.2 | 366.1 |                              |        |       |
| Hpt.236-251-A4G4F1.512       | 1074.2 | 512.1 |                              |        |       |
| Hpt.236-251-A4G4F1.pepHexNAc | 1074.2 | 999.5 |                              |        |       |
| Hpt.236-251-A4G4F2.204       | 1110.7 | 204   |                              |        |       |
| Hpt.236-251-A4G4F2.366       | 1110.7 | 366.1 |                              |        |       |
| Hpt.236-251-A4G4F2.512       | 1110.7 | 512.1 |                              |        |       |
| Hpt.236-251-A4G4F2.pepHexNAc | 1110.7 | 999.5 |                              |        |       |
| Hpt.236-251-A4G4F3.204       | 1147.3 | 204   |                              |        |       |
| Hpt.236-251-A4G4F3.366       | 1147.3 | 366.1 |                              |        |       |
| Hpt.236-251-A4G4F3.512       | 1147.3 | 512.1 |                              |        |       |
| Hpt.236-251-A4G4F3.pepHexNAc | 1147.3 | 999.5 |                              |        |       |

Supplemental Table 4: List of glycopeptides with observed CID peptide or peptide+HexNAc fragments.

| Protein                    | Peptide                   | Glycan  | Precursor mass | Peptide Fragments                              |
|----------------------------|---------------------------|---------|----------------|------------------------------------------------|
| <b>Serotransferrin</b>     | CGLVPVLAENYNK             | A2G2    | 1033.7833 (3+) | Pep+GlcNAc-840.42 (2+)                         |
|                            | QQQHLFGSNVTDCSGNFCLFR     | A2G2    | 1379.9010 (3+) | Pep+GlcNAc-1359.61 (2+)                        |
| <b>Hemopexin</b>           | SWPAVGNCSALR              | A2G2    | 1514.1293 (2+) | Pep+GlcNAc-804.38 (2+)                         |
|                            | TPLPPTSAHGNAEGETKDPDPVTER | 1N1H1NA | 1124.5225 (3+) | y4-504.24 (1+), y6-716.36 (1+), y8-928.44 (1+) |
| <b>Haptoglobin</b>         | VVLHPNYSQVDIGLIK          | A2G2    | 1139.8693 (3+) | Pep+GlcNAc-999.55 (2+), b3-449.29 (1+)         |
|                            | MVSHHNLTTGATLINEQWLLTTAK  | A2G2    | 1434.6615 (3+) | Pep+GlcNAc-1441.73 (2+)                        |
| <b>Complement factor H</b> | IPCSQPPQIEHGTINSSR        | A2G2    | 1215.1938 (3+) | Pep+GlcNAc-1112.53 (2+)                        |
| <b>Clusterin 1</b>         | HNSTGCLR                  | A2G2    | 1284.0117 (2+) | Pep+GlcNAc-1148.52 (1+)                        |

Supplemental Table 5: List of all quantified glycopeptides by FT-ICR/MRM (upper part) and by FT-ICR only (lower part) with calculated median intensities (Me Intensity), median ratios (Me Ratio), standard deviations (SD) and p-values.

| Protein/Peptide                         |                 | Glycoform    |        | FT-ICR     |         |                |         |         | MRM        |         |                |         |         |
|-----------------------------------------|-----------------|--------------|--------|------------|---------|----------------|---------|---------|------------|---------|----------------|---------|---------|
| Haptoglobin                             |                 |              |        | Colorectal | HCC     | Colorectal+met | HCC/HCV | Control | Colorectal | HCC     | Colorectal+met | HCC/HCV | Control |
| MVSHHNLTTGATLINEQWLLTTAK                | A3G3F1          | Me Intensity |        | 4.6E+06    | 1.1E+07 | 2.4E+07        | 3.4E+06 | 4.8E+06 | 2.0E+06    | 9.9E+05 | 2.5E+06        | 4.0E+05 | 3.8E+05 |
|                                         | A3G3            | Me Intensity |        | 9.3E+07    | 8.3E+07 | 1.1E+08        | 1.1E+07 | 2.3E+07 | 5.0E+06    | 3.7E+06 | 8.7E+06        | 3.8E+05 | 2.4E+06 |
|                                         | A2G2            | Me Intensity |        | 9.7E+08    | 5.1E+08 | 7.5E+08        | 9.4E+07 | 2.0E+08 | 3.8E+07    | 1.8E+07 | 4.7E+07        | 3.2E+06 | 1.7E+07 |
|                                         | A3G3F1/A3G3     | Me Ratio     |        | 7.1        | 13.5    | 17.0           | 36.0    | 27.3    | 26.8       | 28.6    | 23.4           | 89.4    | 15.6    |
|                                         |                 | SD           |        | 15.1       | 13.7    | 13.2           | 41.2    | 14.3    | 14.3       | 12.3    | 14.3           | 57.0    | 10.2    |
|                                         |                 | p-value      |        | 0.1        | 0.3     | 0.3            | 0.2     |         | 0.2        | 0.09    | 0.3            | 0.0008  |         |
|                                         | A3G3/A2G2       | Me Ratio     |        | 9.5        | 14.1    | 14.7           | 10.4    | 8.6     | 17.2       | 19.8    | 18.4           | 13.7    | 15.1    |
|                                         |                 | SD           |        | 4.2        | 6.3     | 7.5            | 9.5     | 13.7    | 7.8        | 6.5     | 5.0            | 4.3     | 5.6     |
| p-value                                 |                 |              | 0.3    | 0.003      | 0.01    | 0.4            |         | 0.5     | 0.009      | 0.07    | 0.9            |         |         |
| VVLHPNYSQVDIGLIK                        | A3G3F1          | Me Intensity |        | 4.7E+07    | 1.2E+08 | 7.2E+07        | 1.0E+07 | 7.9E+06 | 8.1E+05    | 5.0E+05 | 1.1E+06        | 1.4E+05 | 6.2E+04 |
|                                         | A3G3            | Me Intensity |        | 5.3E+08    | 6.1E+08 | 7.9E+08        | 4.2E+07 | 1.8E+08 | 6.7E+06    | 3.0E+06 | 9.3E+06        | 3.5E+05 | 1.6E+06 |
|                                         | A2G2            | Me Intensity |        | 4.1E+09    | 3.3E+09 | 4.6E+09        | 5.4E+08 | 1.1E+09 | 3.2E+07    | 1.9E+07 | 5.6E+07        | 2.1E+06 | 1.4E+07 |
|                                         | A3G3F1/A3G3     | Me Ratio     |        | 12.0       | 17.3    | 9.2            | 23.8    | 4.0     | 9.5        | 15.8    | 8.2            | 35.2    | 4.9     |
|                                         |                 | SD           |        | 6.9        | 9.8     | 7.6            | 34.4    | 4.2     | 6.2        | 10.0    | 8.4            | 23.3    | 3.2     |
|                                         |                 | p-value      |        | 0.08       | 0.001   | 0.06           | 0.0009  |         | 0.03       | 0.002   | 0.04           | 0.0009  |         |
|                                         | A3G3/A2G2       | Me Ratio     |        | 14.5       | 18.1    | 16.8           | 8.5     | 9.5     | 21.5       | 16.5    | 17.3           | 19.2    | 15.2    |
|                                         |                 | SD           |        | 7.8        | 2.8     | 4.9            | 3.2     | 1.7     | 5.2        | 3.3     | 3.4            | 6.9     | 5.9     |
| p-value                                 |                 |              | 0.2    | 0.001      | 0.002   | 0.9            |         | 0.2     | 0.8        | 0.9     | 0.7            |         |         |
| Hemopexin<br>TPLPPTSAHGNVAEGETKPPDPVTER | 1N1H2NA         | Me Intensity |        | 5.1E+07    | 8.2E+07 | 6.1E+07        | 7.2E+07 | 3.0E+07 | 6.7E+05    | 5.0E+05 | 5.8E+05        | 6.2E+05 | 2.7E+05 |
|                                         | 1N1H1NA         | Me Intensity |        | 2.1E+09    | 1.8E+09 | 2.3E+09        | 6.8E+08 | 1.9E+09 | 5.6E+07    | 4.0E+07 | 3.8E+07        | 9.5E+06 | 3.4E+07 |
|                                         | 1N1H2NA/1N1H1NA | Me Ratio     |        | 3.1        | 4.2     | 2.6            | 13.0    | 1.6     | 1.1        | 1.7     | 1.5            | 5.8     | 0.9     |
|                                         |                 | SD           |        | 5.2        | 2.3     | 1.3            | 12.3    | 0.8     | 0.6        | 0.8     | 0.6            | 6.4     | 0.3     |
|                                         |                 | p-value      |        | 0.01       | 0.004   | 0.03           | 0.0002  |         | 0.08       | 0.004   | 0.007          | 0.0003  |         |
| Protein/Peptide                         | Glycoform       |              | FT-ICR |            |         |                |         |         |            |         |                |         |         |
| Hemopexin<br>SWPAVGNCSSALR              | A3G3F1          | Me Intensity |        | 2.7E+07    | 1.7E+07 | 2.1E+07        | 1.4E+07 | 8.7E+06 |            |         |                |         |         |
|                                         | A3G3            | Me Intensity |        | 4.9E+07    | 3.1E+07 | 3.4E+07        | 9.9E+06 | 1.7E+07 |            |         |                |         |         |
|                                         | A2G2F1          | Me Intensity |        | 6.1E+07    | 7.2E+07 | 1.2E+08        | 7.1E+07 | 4.9E+07 |            |         |                |         |         |
|                                         | A2G2            | Me Intensity |        | 1.0E+09    | 1.0E+09 | 1.3E+09        | 5.1E+08 | 7.9E+08 |            |         |                |         |         |
|                                         | A3G3F1/A3G3     | Me Ratio     |        | 59.2       | 60.5    | 49.3           | 148.2   | 49.2    |            |         |                |         |         |
|                                         |                 | SD           |        | 28.2       | 41.0    | 34.9           | 98.7    | 43.4    |            |         |                |         |         |
|                                         |                 | p-value      |        | 0.6        | 0.3     | 1.0            | 0.007   |         |            |         |                |         |         |
|                                         | A2G2F1/A2G2     | Me Ratio     |        | 8.3        | 7.8     | 9.4            | 13.4    | 7.1     |            |         |                |         |         |



|                            |             |              |         |         |         |         |         |
|----------------------------|-------------|--------------|---------|---------|---------|---------|---------|
|                            |             | SD           | 3.2     | 5.5     | 2.9     | 2.2     | 1.5     |
|                            |             | p-value      | 0.3     | 0.1     | 0.05    | 0.001   |         |
| <b>Complement factor H</b> |             |              |         |         |         |         |         |
| IPCSQPPQIEHGTINSSR         | A3G3F1      | Me Intensity | 8.7E+06 | 9.0E+06 | 8.5E+06 | 1.5E+07 | 1.2E+07 |
|                            | A3G3        | Me Intensity | 3.9E+07 | 2.8E+07 | 3.7E+07 | 8.8E+06 | 3.3E+07 |
|                            | A2G2F1      | Me Intensity | 1.0E+08 | 6.4E+07 | 1.2E+08 | 7.0E+07 | 7.9E+07 |
|                            | A2G2        | Me Intensity | 1.6E+09 | 9.3E+08 | 1.5E+09 | 3.3E+08 | 1.4E+09 |
|                            | A3G3F1/A3G3 | Me Ratio     | 30.0    | 33.5    | 26.3    | 139.8   | 40.3    |
|                            |             | SD           | 9.5     | 9.2     | 18.2    | 169.9   | 28.3    |
|                            |             | p-value      | 0.4     | 0.5     | 0.3     | 0.0006  |         |
|                            | A2G2F1/A2G2 | Me Ratio     | 6.7     | 6.5     | 6.6     | 18.7    | 6.1     |
|                            |             | SD           | 1.3     | 2.5     | 1.8     | 18.4    | 1.4     |
|                            |             | p-value      | 1.0     | 0.8     | 0.7     | 0.0002  |         |

Supplemental Figure 1: A) The simulated (red) and measured (black) isotopic pattern of haptoglobin glycopeptide VVLHPNYSQVDIGLIK bearing the tri-antennary fucosylated glycan observed as triply charged ion at  $m/z$  1310.26626 by FT-ICR. One of the co-eluted ion at  $m/z$  1309.96744 is shown in grey. B) XICs of the transitions of the same glycopeptide analyzed by MRM. All monitored transitions have maximum intensity at retention time 12.5 min.

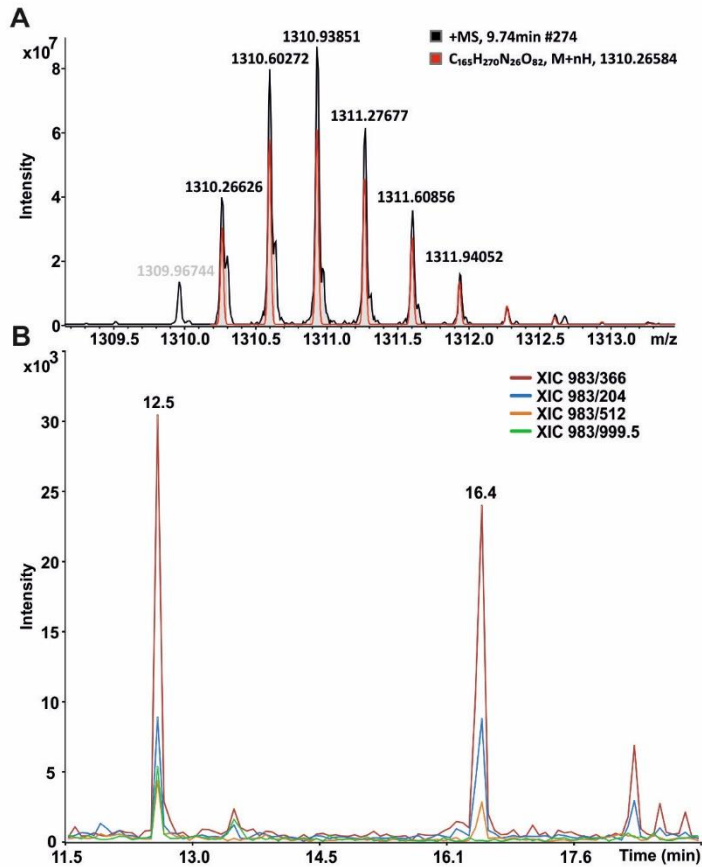

Supplemental Figure 2: Extract ion chromatograms of bi-antennary (high abundant) and tri-antennary fucosylated (low abundant) haptoglobin glycopeptides VVLHPNYSQVDIGLIK measured in three technical replicates of the control sample. The XICs of the low abundant fucosylated glycopeptide are reproducible which enabled its quantification.

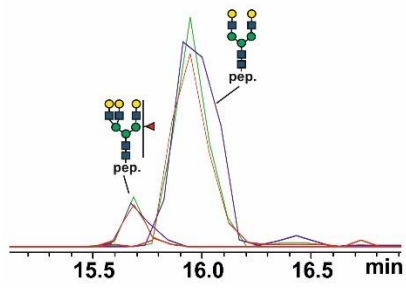

# Table of Contents (TOC)

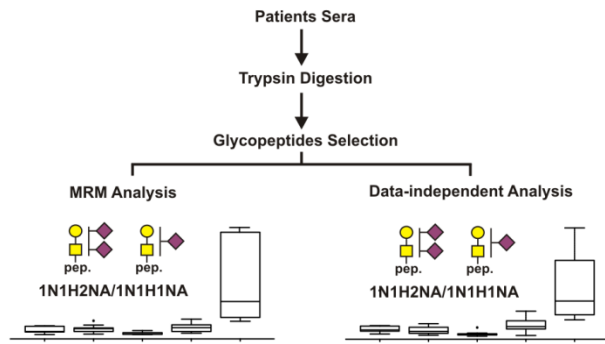

Supplement: NIHMS887233-supplement-supplemental_materials.pdf [file NIHMS887233-supplement-supplemental_materials.pdf]
